# Supplementary material
Source: Frontiers journal article supplement (https://www.frontiersin.org/articles/565528)
Supplement: Data_Sheet_3.PDF [file Data_Sheet_3.PDF]

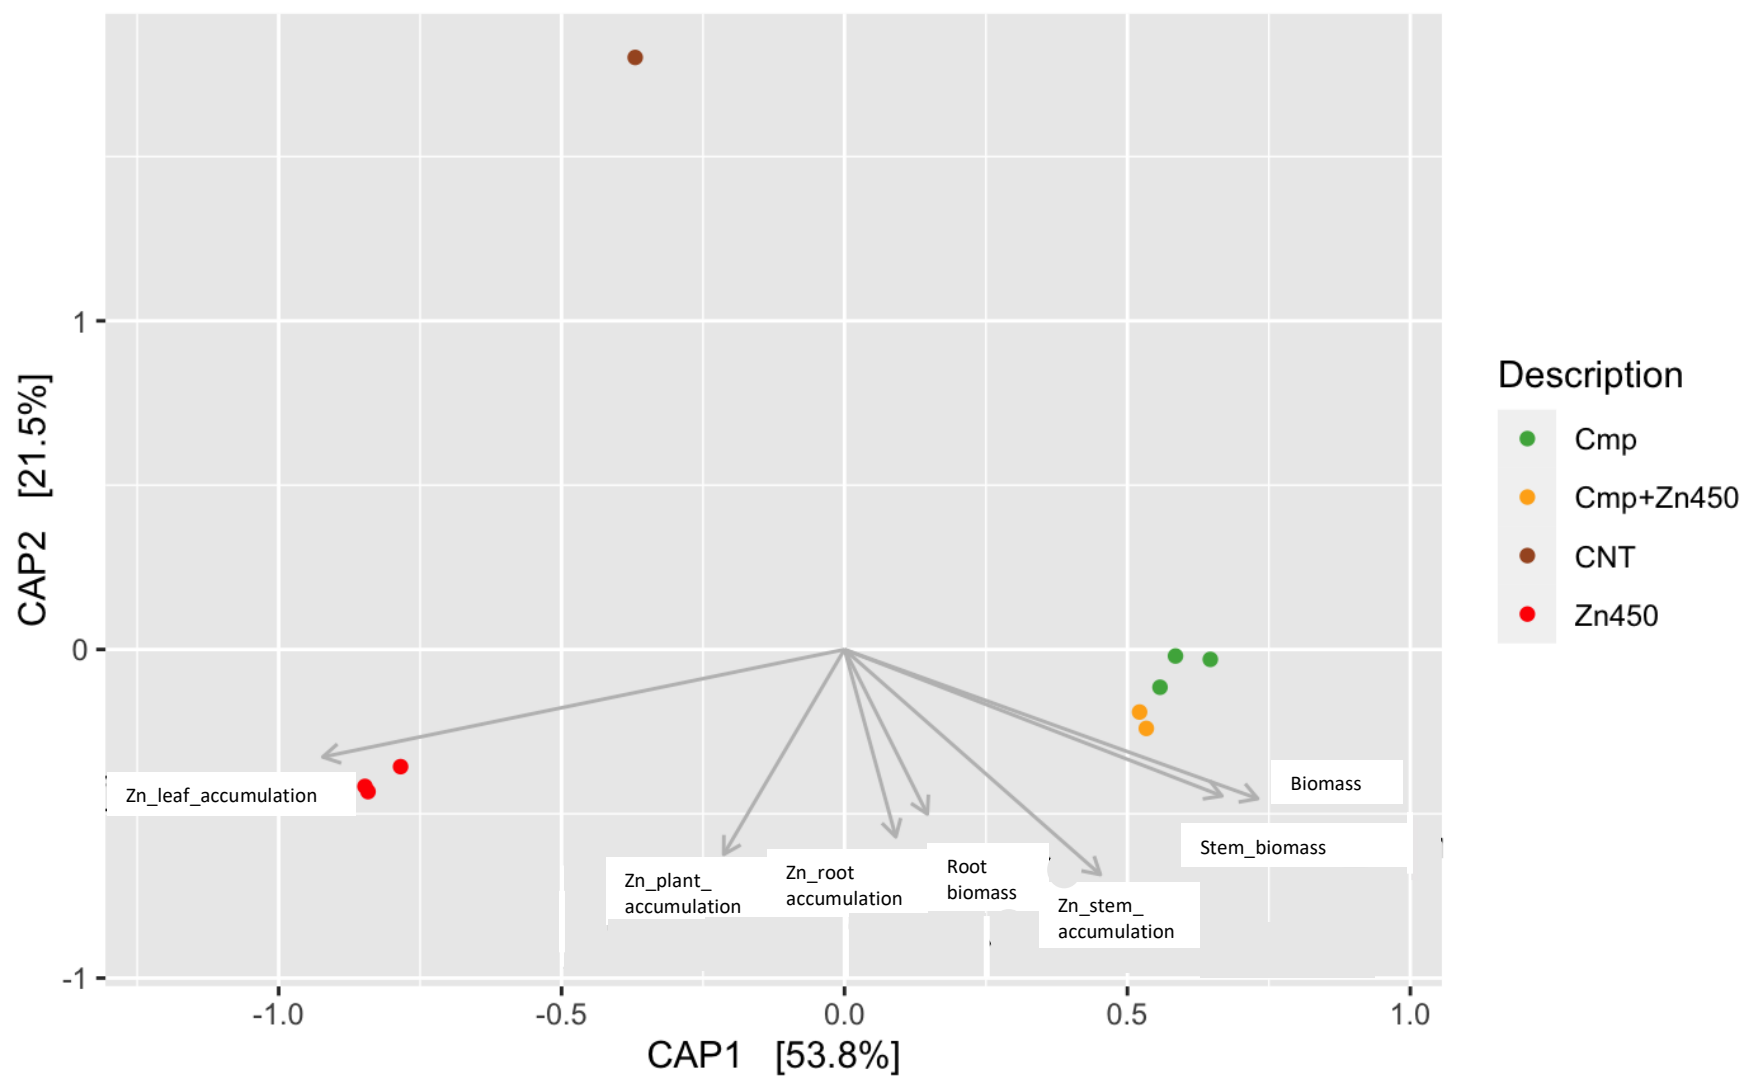

Fig. S3. Canonical analysis of principal coordinate (CAP) including the Bray Curtis distance of bacterial community. The axes created by a combination of: total biomass produced by plants (Biomass) and for each organ (Root\_biomass, Stem\_biomass, Leaf\_biomass); Zn accumulation in plants and in each organ (Zn\_plant\_accumulation, Zn\_root\_accumulation, Zn\_stem\_accumulation, Zn\_leaf\_accumulation).
